# Supplementary material for: Lanthanum-based coordination polymers microplates using a “green ligand” EDTA with tailorable morphology and fluorescent property
Source: Royal Society of Chemistry journal article supplement (doi:10.1039/c3ra46829a), 2014-01-01
Supplement: c3ra46829a.pdf [file c3ra46829a.pdf]

## Supporting information

### **Lanthanum based coordination polymers microplates using a “green” ligand EDTA with tailorable morphology and fluorescent property**

**Zhurui Shen,<sup>\*a, d</sup> Sisi He,<sup>a</sup> Pengcheng Yao,<sup>a</sup> Xun Lao,<sup>a</sup> Bin Yang,<sup>c</sup> Yejing Dai,<sup>\*\*</sup> Xiaohong Sun<sup>a</sup> and Tiehong Chen<sup>b</sup>**

- a. Key Laboratory for Advanced Ceramics and Machining Technology of Ministry of Education, Tianjin University & School of material Science and Engineering, Tianjin University, Tianjin 300072, PR China, E-mail: shenzhurui@tju.edu.cn
- b. Key Laboratory of Advanced Energy Materials Chemistry (MOE), College of Chemistry, Nankai University, Tianjin 300071, PR China
- c. Shenyang Branch, Shimadzu (China) Co., LTD.
- d. Jiangsu Province Key Laboratory of Fine Petrochemical

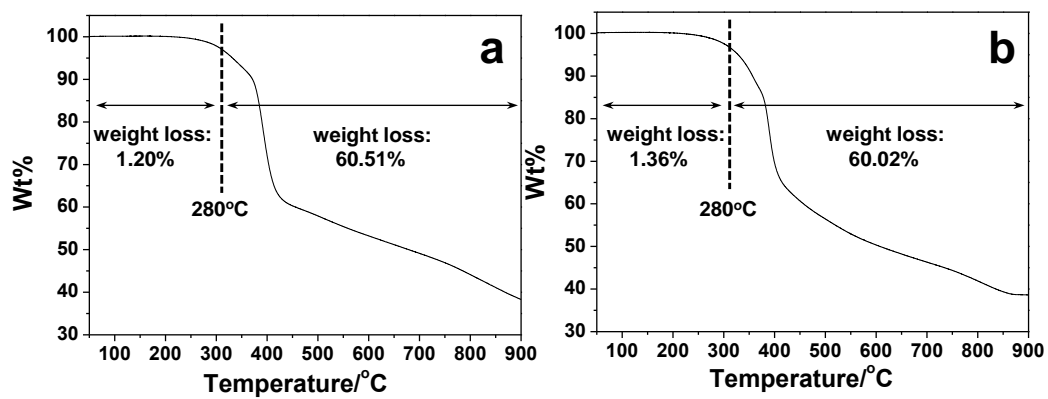

**Figure S1.** TGA curves of (a) La-EDTA CPs microplates and (b) Ce-EDTA CPs microplates

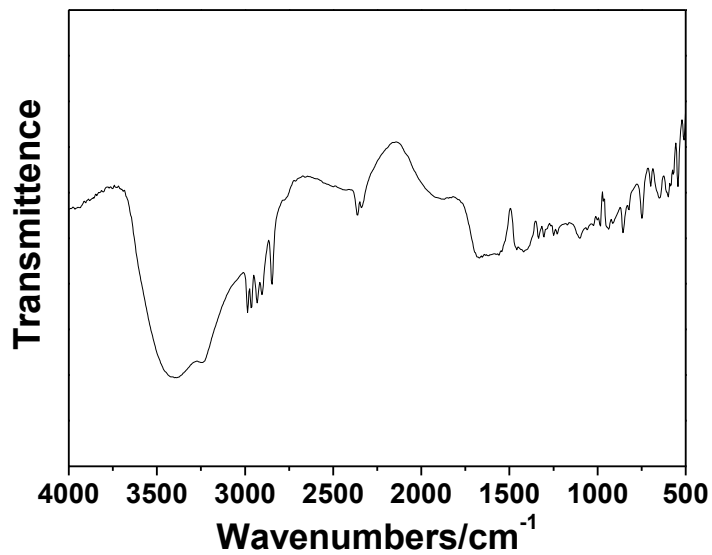

**Figure S2.** The FT-IR spectrum of Ce-EDTA CPs microplates.

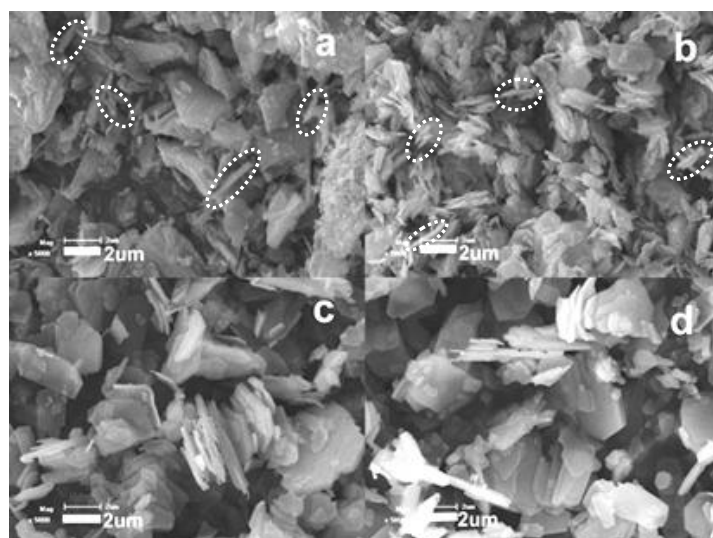

**Figure S3.** SEM images of La-EDTA CPs obtained (a) without hydrothermal treatment. After (b) 2 h, (c) 8 h and (d) 12 h reaction at 160 °C with the molar ratio of EDTA-2Na: La<sup>3+</sup>=10: 8, and the La<sup>3+</sup> is 8 mmol. The white circles highlighted some microsticks of CPs.

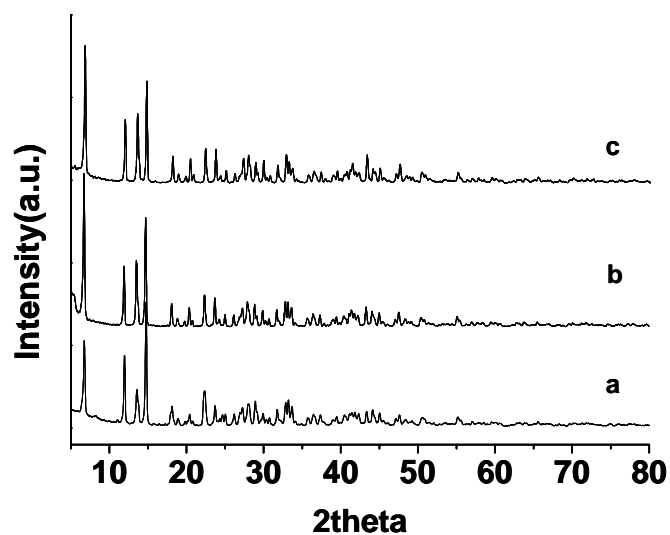

**Figure S4.** The XRD patterns of La-EDTA CPs obtained after (a) 0 h, (b) 8 h and (c) 12 h, reaction at 160 °C with the molar ratio of EDTA-2Na: La<sup>3+</sup>=10: 8, and the La<sup>3+</sup> is 8 mmol.
